# Supplementary material
Source: MDPI journal article supplement (https://www.mdpi.com/2076-0760/8/8/225)
Supplement: s1 [file s1]

## **Supplementary Material. Questionnaire**

Name of Community:

Island/Province/Country:

Date when the information was collected (and name of interviewer):

Name(s) and Gender of Key Informants:

Languages used in Interview

### **1 Population and Economy**

- a How many people live in this community?
- b How many households are there?
- c How many people under 21 are normally resident in this community?
- d How many people over 65 are normally resident in this community?
- e How many people are in full-time employment at present?
- f How many people are in casual/seasonal employment?
- g What is the average household income (in US dollars) in this community?

### **2 Transport and Infrastructure**

- a What are the three most common types of transport used by people in this community?
- b How much does it cost (US\$) a person to travel (one way) from their home to the nearest town (see definition below) by the cheapest route?
- c How long (hours) does it take a person to travel from their home (one way) to the nearest town by the cheapest route?
- d Does the community have any motor vehicles? If yes, what kind and how many of each kind?
- e How many households in the community have electricity?
- f How is this electricity supplied (what are the sources of electricity)?
- g How many solar panels are there in the community?

### **3 Government Services and Education**

- a How many people in this community attend primary school?
- b Do primary school students go to school and come home every day - or every week - or longer?
- c How many people in this community attend secondary school?
- d Do secondary school students go to school and come home every day - or every week - or longer?
- e How many people staying in this community have completed high school/secondary education?
- f How many people from this community attend tertiary institutions (vocational/college/university)?
- g Do tertiary students go to college and come home every day - or every week - or longer?
- h How many people staying in this community have completed a program of tertiary study?
- i How much does it cost (US\$) one student to travel to primary school and back?
- j How long does it take (hours) one student to travel to primary school and back?
- k How much does it cost (US\$) one student to travel to secondary school and back?
- l How long does it take (hours) one student to travel to secondary school and back?
- m Which government departments have offices within 30 minutes walk of the community?

### **4 Health**

- a How long (hours) does it take to reach the closest hospital (defined as a place where surgery can be performed)?
- b How do you get to this hospital (what means of transport do you use)?
- c How much does it cost (US\$) to reach this hospital (one way)?
- d How many times each year does a typical member of an average household in this community visit this hospital?
- e How long (hours) does it take to reach the closest medical post (nursing station, dispensary)?

- f How do you get there (means of transport)?
- g Can the community access an ambulance service?
- h If there is a medical emergency, how does the patient get medical treatment in the main hospital by a doctor?
- i Do people in this community use traditional (non-western) medicines commonly or rarely (including not at all)?
- j What are the main uses for traditional medicines in this community?
- k Does the community have any traditional healers? If yes, how many?
- l Which does your community mostly prefer, western or traditional medicine?
- m Which ailments or diseases do people in the community prefer to treat using western medicine?
- n How many times each month does a typical member of an average household in the community use traditional medicine?

## **5 Communications and Technology**

- a How many televisions are there in the community?
- b Is the television signal reliable and the reception quality good?
- c How many television channels can the community receive well?
- d How many mobile phones are there in the community?
- e Do people have reliable phone reception?
- f What sources of information do most people in the community use to find out what is happening on other islands and overseas?
- g How many people access internet services in the community?
- h What do people in this community use to access internet?
- i Do people in the community use Facebook, Facebook messenger, Twitter, Viber and Instagram?
- j Which social platform do people in this community use most?
- k Is there a (working) radiotelephone (RT) or similar in the community?

## **6 Culture, Tradition and Religion**

- a How many different religions are followed by people in this community?
- b How many churches/temples are there in or close to this community that serve its members?
- c What are the most common types of equipment that community members use to garden or farm?
- d Do members of this community use mechanized aids (like tractors) to help them garden/farm?
- e How do members in the community water their food gardens?
- f What are the most common types of equipment that community members use to fish?
- g What are the most common types of equipment that community members use to hunt feral land animals?
- h Which materials do members of the community commonly use to build their houses?
- i How often do most (>80%) of heads of households in this community meet?

## **7 Climate, Natural Disaster Prediction and Response**

- a What are the three most common types of natural disaster that affect this community?
- b Explain the main impacts (maximum two) of each type of the natural disaster.
- c How does the community know when a disaster is about to strike them?
- d Does the community have any traditional knowledge (passed down by older generations) about the signs of imminent disaster? If yes, please explain.
- e In the last five years, how many times has this community been affected by a natural disaster?
- f In the last five years, how many times did the government provide assistance after a natural disaster?
- g What type of assistance do you receive from the government/others after such disasters?
- h Is this assistance adequate?
- i Does your community have traditional ways (passed down from ancestors) about how to cope with the effects/impacts of natural disasters? If yes, please provide more detail.
- j What are some of the changes you have noticed taking place in the environment?
- k Why do you think these changes are taking place?

- l What have you tried doing to prevent/slow these changes in the environment from taking place? Did these actions help?
- m Has the community received any outside support or advice about how to cope with environmental changes?
- n If yes (to Question 7m), then which organisations gave this support/advice, and has it helped or not?

## **8 Water, Diet and Food Production**

- a How do members in the community obtain drinking water?
- b Do members of the community use rainwater for drinking?
- c Do members of the community use rainwater for washing?
- d Is the supply of water adequate for community needs? If no, then how does the community cope?
- e Is the quality of water suitable for drinking? If no, then what does the community practice to make the water safe to drink?
- f Have you experienced drought affecting the community's water supply? If yes, how often does drought occur?
- g If yes, how did you cope?
- h How much of the food consumed by this community does it produce (%)?
- i What are the ten most common foods that the community produces for its own consumption?
- j Does the community have enough land for producing food?
- k Does the community have enough access to ocean for obtaining seafood?
- l How many shops are there within 30 minutes walk of this community?
- m What are the five most common items the community purchases from these shops?
- n How much does each of these five items cost (per unit) in these shops?
- o How many times each week does the average household in the community buy food from the shops?
- p In one week for an average household, how many meals (from 21 meals per week) are eaten with mainly food from the garden or sea?

- q In one week, does the average household eat more shop-bought food than food they get by themselves from the land and sea?
